# Supplementary material
Source: Research Square preprint supplement (doi:10.21203/rs.3.rs-8887327/v1)
Supplement: Supplementary file 2 [file 6d2fa36cafeaa28dc58eb736.pdf]

## Extended Data Fig.1

a

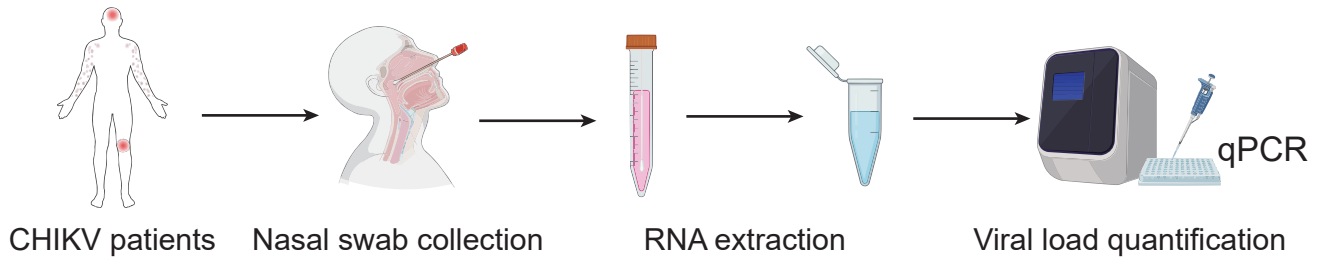

### Extended Data Fig. 1 | Schematic of the clinical sample processing workflow.

**a**, Illustration of the experimental steps for viral load quantification encompassing nasopharyngeal swab collection, viral inactivation, and qRT-PCR analysis.
