# Supplementary material
Source: Research Square preprint supplement (doi:10.21203/rs.3.rs-8887327/v1)
Supplement: Supplementary file 3 [file 9b9e1a8858e4ba60b227e1ba.pdf]

a

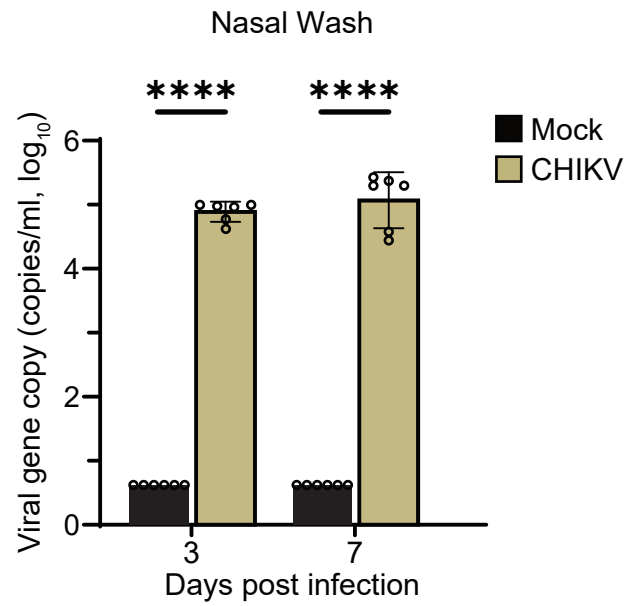

**Extended Data Fig. 5 | Quantification of viral shedding in murine nasal washes. a,** Longitudinal analysis of viral RNA loads in nasal washes collected from Mock-infected and CHIKV-infected AG129 mice at 3 and 7 days post-infection (d.p.i.). Viral burden was quantified via qRT-PCR and is expressed as log<sub>10</sub> copies per ml. Data are presented as mean  $\pm$  s.d. with individual data points overlaid (n = 5 biologically independent animals per group). \*\*\*\*P < 0.0001 (two-way ANOVA with multiple comparisons).
