# Supplementary material
Source: Research Square preprint supplement (doi:10.21203/rs.3.rs-8887327/v1)
Supplement: Supplementary file 4 [file c238a1191ffa9022a53f72d8.pdf]

**Supplementary Table 3. Clinical characteristics of patients providing adjacent non-tumor lung tissues**

| <b>Patient No.</b> | <b>Gender</b> | <b>Age</b> | <b>Cancer Subtype</b> | <b>Cancer Stage (TNM)</b> |
|--------------------|---------------|------------|-----------------------|---------------------------|
| 1                  | M             | 65         | LUAD                  | T1bN0M0                   |
| 2                  | F             | 54         | LUAD                  | T1cN0M0                   |
| 3                  | M             | 71         | LUAD                  | T2aN0M0                   |
| 4                  | M             | 62         | LUAD                  | T2bN1M0                   |
| 5                  | F             | 49         | LUAD                  | T3N0M0                    |
| 6                  | M             | 58         | LUAD                  | T1aN0M0                   |
| 7                  | M             | 67         | LUAD                  | T4N0M0                    |
| 8                  | F             | 60         | LUAD                  | T2aN0M0                   |

Legend: F, female; M, male; LUAD, Lung Adenocarcinoma
