# Supplementary material
Source: Research Square preprint supplement (doi:10.21203/rs.3.rs-8887327/v1)
Supplement: Supplementary file 5 [file d23108980d57be87cf397653.pdf]

**Supplementary Table 2. Primers sequence for qRT-PCR**

| Gene                      | Forward primer (5'-3')   | Reverse primer (5'-3')     |
|---------------------------|--------------------------|----------------------------|
| <i>CHIKV gene</i>         |                          |                            |
| E2                        | TCACTCCCTGTTGGACTTGATAGA | TTGACGAACAGAGTTAGGAACATACC |
| <i>Mus musculus genes</i> |                          |                            |
| Gapdh                     | AGGTCGGTGTGAACGGATTTG    | TGTAGACCATGTAGTTGAGGTCA    |
| Ifi27                     | GCAGTCTCTGGCACCATTCTAG   | ATGGTGCCAACCTTCAGTGCTC     |
| Mx1                       | TGGACATTGCTACCACAGAGGC   | TTGCCTTCAGCACCTCTGTCCA     |
| Ifit1                     | TACAGGCTGGAGTGTGCTGAGA   | CTCCACTTTCAGAGCCTTCGCA     |
| Isg15                     | CATCCTGGTGAGGAACGAAAGG   | CTCAGCCAGAACTGGTCTTCGT     |
| Ifitm3                    | TTCTGCTGCCTGGGCTTCATAG   | ACCAAGGTGCTGATG TTCAGGC    |
| Oas1a                     | GAGGTGGAGTTTGATGTGCTGC   | GTGAAGCAGGTAGAGAACTCGC     |
| Bst2                      | CAAACCTCTGCAACCTGACCGT   | CTCCTGGTTCAGCTTCGTGACT     |
| Stat1                     | GCCTCTCATTGTCACCGAAGAAC  | TGGCTGACGTTGGAGATCACCA     |
| Socs3                     | GGACCAAGAACCTACGCATCCA   | CACCAGCTTGAGTACACAGTCG     |
| Rplp0                     | GCTTCGTGTTACCAAGGAGGA    | GTCCTAGACCAGTGTCTGAGC      |
| Hprt1                     | CTGGTGAAAAGGACCTCTCGAAG  | CCAGTTTCACTAATGACACAAACG   |
| Ppia                      | CATACAGGTCCTGGCATCTTGTC  | AGACCACATGCTTGCCATCCAG     |
| Tbp                       | CTACCGTGAATCTTGCTGTAAAC  | AATCAACGCAGTTGTCCGTGGC     |
| Il-6                      | TACCACTTACAAGTCGGAGGC    | CTGCAAGTGCATCATCGTTGTTC    |
| Ifnl2                     | CCAGTGGAAGCAAAGGATTGCC   | TCAGGTCCTTCTCAAGCAGCCT     |
| Ifnl3                     | CCAGTGGAAGCAAAGGATTGCC   | GCACCTCATGTCCTTCTCAAGC     |
| <i>Homo sapiens genes</i> |                          |                            |
| MXRA8                     | TTACTGTGGCCTGCACGAAC     | CTCTCGGGGACGATGACATT       |
| GAPDH                     | GGAGCGAGATCCCTCCAAAAT    | GGCTGTTGTCATACTTCTCATGG    |
| PTGS2                     | CGGTGAAACTCTGGCTAGACAG   | GCAAACCGTAGATGCTCAGGGA     |
| MT2A                      | GAGTGCAAATGCACTTCGTGCAA  | GCGTTCTTTACATCTGGGAGCG     |
| CYP24A1                   | GCTTCTCCAGAAGAATGCAGGG   | CAGACCTTGGTGTGAGGCTCT      |
| IDO1                      | GCCTGATCTCATAGAGTCTGGC   | TGCATCCCAGAACTAGACGTGC     |

|               |                         |                         |
|---------------|-------------------------|-------------------------|
| BAX           | TCAGGATGCGTCCACCAAGAAG  | TGTGTCCACGGCGGCAATCATC  |
| BST2          | TCTCCTGCAACAAGAGCTGACC  | TCTCTGCATCCAGGGAAGCCAT  |
| CXCL10        | GGTGAGAAGAGATGTCTGAATCC | GTCCATCCTTGGAAGCACTGCA  |
| TNF- $\alpha$ | CTCTTCTGCCTGCTGCACTTTG  | ATGGGCTACAGGCTTGTCACCTC |
| IFNA1         | AGAAGGCTCCAGCCATCTCTGT  | TGCTGGTAGAGTTCGGTGCAGA  |
| IFNA2         | TGGGCTGTGATCTGCCTCAAAC  | CAGCCTTTTGGAAGTGGTTGCC  |
| IFNL1         | AACTGGGAAGGGCTGCCACATT  | GGAAGACAGGAGAGCTGCAACT  |
| IFNL3         | CGCCTTGGAGGCAGTTGTG     | GAGGGCCTCAGCGTCAGT      |
| MX1           | GGCTGTTTACCAGACTCCGACA  | CACAAAGCCTGGCAGCTCTCTA  |
| OAS1          | AGGAAAGGTGCTTCCGAGGTAG  | GGACTGAGGAAGACAACCAGGT  |
| IL-6          | AGACAGCCACTCACCTCTTCAG  | TTCTGCCAGTGCCTCTTTGCTG  |
| IFNL2         | TCGCTTCTGCTGAAGGACTGCA  | CCTCCAGAACCTTCAGCGTCAG  |

---
