# Supplementary material
Source: Research Square preprint supplement (doi:10.21203/rs.3.rs-8887327/v1)
Supplement: Supplementary file 6 [file ed3684b9387ecbd4cb8503d2.pdf]

**Supplementary Table 1 Clinical characteristics of patients with CHIKV infection**

| Case No. | Age | Gender | CT Value | Onset symptom | Sample collection | Fever | Arthralgia | Rash | Other symptoms                                 |
|----------|-----|--------|----------|---------------|-------------------|-------|------------|------|------------------------------------------------|
| 1        | 31  | M      | 33.15    | 9-Sep-25      | 14-Sep-25         | Y     | Y          | Y    | None                                           |
| 2        | 65  | F      | 20.79    | 14-Sep-25     | 16-Sep-25         | N     | Y          | N    | Pharyngeal congestion                          |
| 3        | 21  | M      | 22.04    | 15-Sep-25     | 16-Sep-25         | N     | Y          | Y    | None                                           |
| 4        | 64  | M      | 22.13    | 14-Sep-25     | 16-Sep-25         | N     | Y          | Y    | Pharyngeal congestion                          |
| 5        | 32  | F      | 27.92    | 15-Sep-25     | 16-Sep-25         | N     | N          | Y    | Myalgia                                        |
| 6        | 41  | M      | 25.85    | 12-Sep-25     | 16-Sep-25         | Y     | Y          | Y    | None                                           |
| 7        | 33  | F      | 21.90    | 27-Sep-25     | 29-Sep-25         | Y     | Y          | Y    | Dizziness, Myalgia                             |
| 8        | 46  | M      | 20.55    | 25-Sep-25     | 29-Sep-25         | Y     | Y          | Y    | None                                           |
| 9        | 47  | F      | 16.88    | 27-Sep-25     | 29-Sep-25         | Y     | Y          | Y    | None                                           |
| 10       | 52  | M      | 18.01    | 27-Sep-25     | 29-Sep-25         | N     | Y          | N    | None                                           |
| 11       | 22  | F      | 25.03    | 28-Sep-25     | 30-Sep-25         | N     | Y          | Y    | None                                           |
| 12       | 46  | M      | 26.69    | 28-Sep-25     | 29-Sep-25         | Y     | Y          | Y    | Headache, Myalgia                              |
| 13       | 57  | M      | 23.19    | 28-Sep-25     | 30-Sep-25         | N     | Y          | Y    | Chills                                         |
| 14       | 54  | M      | 28.40    | 24-Sep-25     | 29-Sep-25         | N     | Y          | Y    | None                                           |
| 15       | 56  | F      | 22.15    | 28-Sep-25     | 30-Sep-25         | N     | Y          | Y    | None                                           |
| 16       | 26  | M      | 22.49    | 29-Sep-25     | 30-Sep-25         | Y     | Y          | Y    | None                                           |
| 17       | 42  | M      | 19.86    | 29-Sep-25     | 30-Sep-25         | N     | Y          | Y    | Chills                                         |
| 18       | 59  | M      | 26.69    | 27-Sep-25     | 29-Sep-25         | Y     | Y          | Y    | None                                           |
| 19       | 47  | M      | 21.02    | 26-Sep-25     | 29-Sep-25         | Y     | Y          | Y    | None                                           |
| 20       | 19  | F      | 23.60    | 25-Sep-25     | 29-Sep-25         | N     | Y          | Y    | None                                           |
| 21       | 69  | M      | 26.55    | 23-Sep-25     | 24-Sep-25         | N     | Y          | N    | None                                           |
| 22       | 35  | M      | 22.66    | 20-Oct-25     | 22-Oct-25         | N     | Y          | Y    | Chills                                         |
| 23*      | 27  | M      | N.D.     | 16-Oct-25     | 17-Oct-25         | N     | Y          | Y    | Nasal congestion, Pharyngeal congestion, Cough |
| 24       | 37  | M      | 21.65    | 2-Oct-25      | 4-Oct-25          | N     | Y          | Y    | Dizziness                                      |
| 25       | 23  | M      | 34.00    | 4-Oct-25      | 9-Oct-25          | N     | Y          | Y    | Chills                                         |
| 26       | 39  | M      | 22.12    | 11-Oct-25     | 12-Oct-25         | N     | Y          | Y    | Cough                                          |

Legend: F, female. M, male. \*, Zika virus positive, Ct values represent CHIKV specific RT-qPCR detection
