# Supplementary material
Source: Research Square preprint supplement (doi:10.21203/rs.3.rs-8887327/v1)
Supplement: Supplementary file 7 [file f024ed8e8d223147055a5932.pdf]

### Extended Data Fig.3

a

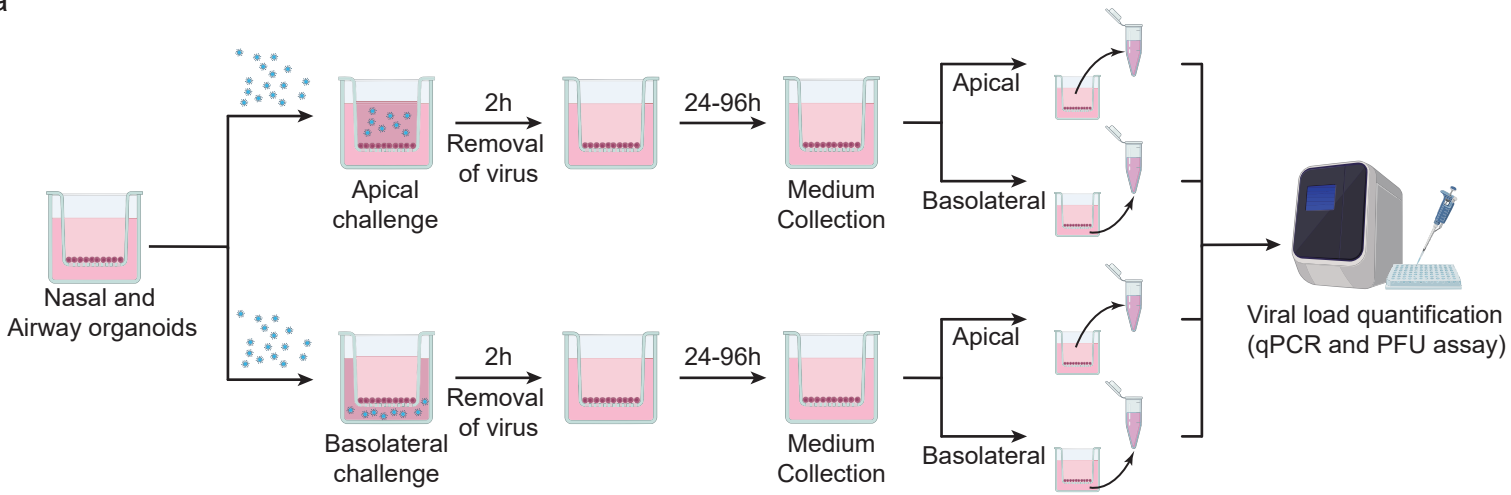

**Extended Data Fig. 3 | Experimental design for assessing bidirectional viral infection and shedding kinetics.** a, Schematic diagram illustrating the experimental workflow to evaluate the polarity of CHIKV entry and release in respiratory organoids. Nasal and airway organoids were subjected to viral challenge via either the apical or basolateral compartment for 2 h. Following the removal of the inoculum and washing steps, culture supernatants were harvested from both apical and basolateral chambers at defined time points (24-96 h.p.i) to quantify viral production and secretion directionality using viral load quantification (qPCR) and plaque assay (PFU).
